# Supplementary material for: Humic lakes with inefficient and efficient transfer of matter in planktonic food webs
Source: PubMed Central journal article supplement (PMC10188500; doi:10.1038/s41598-023-35039-1), 2023-05-16
Supplement: 41598_2023_35039_MOESM1_ESM.pdf [file 41598_2023_35039_MOESM1_ESM.pdf]

## Supplementary Informations

for the article ‘Humic lakes with inefficient and efficient transfer of matter in planktonic food webs’ by Maciej Karpowicz, Magdalena Grabowska, Jolanta Ejsmont-Karabin, Agnieszka Ochocka.

**Table S1.** Hydrochemical parameters in the water column (E – epilimnion; M – metalimnion; H – hypolimnion) of the studied humic lakes.

| lakes | layer | Temp.<br>[°C] | O <sub>2</sub><br>[mg L <sup>-1</sup> ] | DOC<br>[mg L <sup>-1</sup> ] | DIC<br>[mg L <sup>-1</sup> ] | Color<br>[mg Pt L <sup>-1</sup> ] | TP<br>[mg L <sup>-1</sup> ] | PO <sub>4</sub> <sup>3-</sup><br>[μg L <sup>-1</sup> ] | TN<br>[mg L <sup>-1</sup> ] | NH <sub>4</sub> <sup>+</sup><br>[μg L <sup>-1</sup> ] | NO <sub>3</sub> <sup>-</sup><br>[μg L <sup>-1</sup> ] | NO <sub>2</sub> <sup>-</sup><br>[μg L <sup>-1</sup> ] |
|-------|-------|---------------|-----------------------------------------|------------------------------|------------------------------|-----------------------------------|-----------------------------|--------------------------------------------------------|-----------------------------|-------------------------------------------------------|-------------------------------------------------------|-------------------------------------------------------|
| 1     | E     | 24.7          | 8.62                                    | 7.33                         | 7.60                         | 107                               | 0.42                        | 162.31                                                 | 0.73                        | 0.39                                                  | 7.34                                                  | 0.53                                                  |
| 1     | M     | 15.1          | 6.41                                    | 7.43                         | 5.30                         | 56.1                              | 0.50                        | 0.06                                                   | 1.01                        | 80.22                                                 | 3.40                                                  | 0.21                                                  |
| 1     | H     | 12.2          | 2.99                                    | 7.04                         | 8.45                         | 76.4                              | 0.44                        | 0.05                                                   | 0.76                        | 2.47                                                  | 4.81                                                  | 0.24                                                  |
| 2     | E     | 26.3          | 7.44                                    | 8.49                         | 5.08                         | 51.0                              | 0.54                        | 2.47                                                   | 0.88                        | 19.95                                                 | 119.89                                                | 5.24                                                  |
| 2     | M     | 15.6          | 4.21                                    | 7.78                         | 4.81                         | 61.1                              | 0.47                        | 1.88                                                   | 2.00                        | 63.93                                                 | 56.66                                                 | 0.31                                                  |
| 2     | H     | 8.6           | 0.36                                    | 7.63                         | 9.02                         | 66.2                              | 0.44                        | 0.96                                                   | 2.02                        | 625.24                                                | 4.49                                                  | 0.51                                                  |
| 3     | E     | 22.1          | 9.32                                    | 6.88                         | 5.23                         | 8.6                               | 0.33                        | 0.02                                                   | 0.63                        | 26.42                                                 | 0.84                                                  | 0.04                                                  |
| 3     | M     | 15            | 7.61                                    | 8.08                         | 11.59                        | 56.1                              | 0.18                        | 0.02                                                   | 0.69                        | 24.04                                                 | 0.50                                                  | 0.06                                                  |
| 3     | H     | 12.1          | 0.44                                    | 7.03                         | 5.46                         | 40.8                              | 0.30                        | 0.09                                                   | 0.71                        | 7.42                                                  | 0.26                                                  | 0.14                                                  |
| 4     | E     | 24.4          | 8.61                                    | 5.91                         | 11.41                        | 30.6                              | 0.26                        | 0.05                                                   | 0.91                        | 16.80                                                 | 4.38                                                  | 0.36                                                  |
| 4     | M     | 22.8          | 5.44                                    | 6.51                         | 6.74                         | 51.0                              | 0.43                        | 0.24                                                   | 0.95                        | 17.97                                                 | 2.23                                                  | 0.08                                                  |
| 4     | H     | 11            | 1.15                                    | 6.07                         | 5.15                         | 45.9                              | 0.38                        | 0.16                                                   | 0.79                        | 30.47                                                 | 4.60                                                  | 0.11                                                  |
| 5     | E     | 25.1          | 8.81                                    | 7.00                         | 5.69                         | 20.4                              | 0.62                        | 0.74                                                   | 1.09                        | 42.47                                                 | 17.03                                                 | 0.43                                                  |
| 5     | M     | 18.3          | 11.19                                   | 6.58                         | 4.49                         | 25.5                              | 0.59                        | 0.90                                                   | 1.36                        | 38.21                                                 | 86.06                                                 | 0.40                                                  |
| 5     | H     | 11            | 1.19                                    | 6.14                         | 7.83                         | 30.6                              | 0.53                        | 0.60                                                   | 2.74                        | 454.95                                                | 15.78                                                 | 1.32                                                  |
| 6     | E     | 27.8          | 8.24                                    | 14.83                        | 4.83                         | 30.6                              | 0.46                        | 0.56                                                   | 3.65                        | 3.57                                                  | 35.45                                                 | 1.88                                                  |
| 6     | M     | 17.7          | 3.57                                    | 10.50                        | 4.71                         | 66.2                              | 0.70                        | 1.52                                                   | 2.44                        | 6.76                                                  | 25.27                                                 | 0.72                                                  |
| 6     | H     | 12.2          | 0                                       | 11.17                        | 6.00                         | 112.1                             | 0.60                        | 1.22                                                   | 2.05                        | 344.11                                                | 44.97                                                 | 2.38                                                  |
| 7     | E     | 25.1          | 7.4                                     | 9.90                         | 7.38                         | 40.8                              | 0.30                        | 0.01                                                   | 0.93                        | 18.62                                                 | 56.23                                                 | 0.59                                                  |
| 7     | M     | 20.8          | 11.7                                    | 8.58                         | 5.17                         | 107.0                             | 0.36                        | 0.77                                                   | 1.10                        | 115.73                                                | 51.58                                                 | 6.53                                                  |
| 7     | H     | 13.4          | 2.07                                    | 8.69                         | 13.39                        | 71.3                              | 0.49                        | 0.09                                                   | 1.54                        | 1.32                                                  | 83.83                                                 | 2.96                                                  |
| 8     | E     | 25.1          | 8.32                                    | 9.28                         | 8.54                         | 61.1                              | 0.39                        | 0.08                                                   | 0.87                        | 1.44                                                  | 3.53                                                  | 0.05                                                  |
| 8     | M     | 21.1          | 4.87                                    | 11.19                        | 10.95                        | 101.9                             | 0.35                        | 0.05                                                   | 1.12                        | 1.69                                                  | 0.84                                                  | 0.04                                                  |
| 9     | E     | 25.3          | 7.83                                    | 14.74                        | 4.22                         | 152.9                             | 0.62                        | 0.23                                                   | 1.08                        | 32.08                                                 | 59.50                                                 | 4.99                                                  |
| 9     | M     | 14.9          | 1.16                                    | 13.85                        | 4.22                         | 137.6                             | 0.61                        | 0.20                                                   | 1.12                        | 30.63                                                 | 2.88                                                  | 0.94                                                  |
| 10    | E     | 27.5          | 7.81                                    | 7.37                         | 8.30                         | 35.7                              | 0.59                        | 1.61                                                   | 0.78                        | 1.06                                                  | 6.07                                                  | 0.35                                                  |
| 10    | M     | 23.5          | 8.99                                    | 7.75                         | 7.24                         | 45.9                              | 0.59                        | 2.05                                                   | 0.92                        | 0.84                                                  | 3.67                                                  | 0.15                                                  |

**Table S2.** The list of the dominant phytoplankton taxa with their biomass [mg L<sup>-1</sup>] in vertical profiles of studied humic lakes; *italics* - for species constituting 5-10 % of total biomass; normal font - for species constituting >10-50% of the total biomass; **bold** - for species constituting >50 % of total biomass. E – epilimnion; M – metalimnion; H – hypolimnion.

| lake layer | <i>Merismopedia tenuissima</i> | <i>Gonyostomum semen</i> | <i>Euglena</i> sp. | <i>Cryptomonas</i> spp. | <i>Gymnodinium</i> spp. | <i>Peridinium incospicuum</i> | <i>Peridinium</i> sp. | <i>Asterionella formosa</i> | <i>Dinobryon pediforme</i> | <i>Mallomonas</i> sp. | <i>Ankistrodesmus falcatus</i> | <i>Botryococcus braunii</i> | <i>Crucigenia tetrapedia</i> | <i>Crucigeniella rectangularis</i> | <i>Dictyosphaerium</i> sp. | <i>Gloeotila cf. turfosa</i> | <i>Monoraphidium komarkove</i> | <i>Oocystis</i> spp. | <i>Stichococcus</i> sp. | unicellular Chlorococcales | <i>Cosmarium</i> sp. | <i>Spondylosium papillosum</i> | <i>Staurastrum</i> sp. |
|------------|--------------------------------|--------------------------|--------------------|-------------------------|-------------------------|-------------------------------|-----------------------|-----------------------------|----------------------------|-----------------------|--------------------------------|-----------------------------|------------------------------|------------------------------------|----------------------------|------------------------------|--------------------------------|----------------------|-------------------------|----------------------------|----------------------|--------------------------------|------------------------|
| 1          | E                              |                          |                    |                         |                         |                               |                       |                             |                            |                       | 0.47                           |                             |                              |                                    |                            |                              |                                |                      |                         |                            |                      | 0.52                           | 0.08                   |
|            | M                              | <b>2.67</b>              |                    |                         |                         |                               |                       |                             |                            |                       |                                |                             |                              | 0.16                               |                            |                              |                                |                      |                         |                            |                      |                                |                        |
|            | H                              | <b>0.41</b>              |                    |                         |                         |                               |                       | 0.28                        |                            |                       |                                |                             |                              |                                    |                            |                              |                                |                      |                         |                            |                      |                                |                        |
| 2          | E                              | 0.03                     |                    | 0.08                    |                         |                               |                       |                             |                            |                       |                                | 0.01                        |                              |                                    |                            |                              |                                | 0.02                 |                         |                            |                      |                                |                        |
|            | M                              | <b>1.13</b>              |                    |                         |                         |                               |                       |                             |                            |                       |                                |                             |                              |                                    |                            |                              |                                |                      |                         |                            |                      |                                |                        |
|            | H                              | <b>1.20</b>              |                    |                         |                         |                               |                       |                             |                            |                       |                                |                             |                              |                                    |                            |                              |                                |                      |                         |                            |                      |                                |                        |
| 3          | E                              | <b>0.78</b>              |                    |                         | 0.32                    |                               |                       |                             |                            |                       |                                |                             |                              |                                    |                            |                              |                                |                      |                         |                            |                      |                                |                        |
|            | M                              | <b>4.59</b>              |                    |                         |                         |                               |                       |                             |                            |                       |                                |                             |                              |                                    |                            |                              |                                |                      |                         |                            |                      |                                |                        |
|            | H                              | <b>7.16</b>              |                    |                         |                         |                               |                       |                             |                            |                       |                                |                             |                              |                                    |                            |                              |                                |                      |                         |                            |                      |                                |                        |
| 4          | E                              | <b>0.12</b>              |                    |                         |                         |                               |                       |                             |                            | 0.08                  |                                |                             |                              |                                    |                            |                              |                                |                      |                         |                            |                      |                                |                        |
|            | M                              | 0.37                     |                    |                         |                         |                               |                       |                             | 0.12                       |                       |                                |                             | 0.08                         |                                    |                            |                              |                                |                      |                         |                            |                      | <b>0.83</b>                    |                        |
|            | H                              | 0.07                     |                    |                         |                         |                               | 0.03                  |                             | 0.20                       |                       |                                | 0.03                        |                              |                                    |                            |                              |                                |                      |                         | 0.05                       |                      | 0.13                           |                        |
| 5          | E                              | 0.24                     |                    |                         | 0.13                    |                               |                       |                             |                            |                       |                                |                             |                              |                                    | 0.19                       |                              |                                |                      |                         | 0.04                       |                      |                                |                        |
|            | M                              | <b>0.32</b>              | 0.04               |                         | 0.03                    | 0.04                          |                       |                             |                            |                       |                                |                             |                              |                                    |                            |                              | 0.02                           |                      |                         |                            |                      |                                |                        |
|            | H                              | 0.09                     |                    |                         | <b>1.28</b>             |                               |                       |                             |                            |                       |                                |                             |                              |                                    |                            |                              |                                |                      |                         |                            |                      |                                |                        |
| 6          | E                              |                          |                    |                         |                         |                               |                       |                             |                            |                       |                                |                             |                              |                                    |                            |                              |                                |                      |                         | <b>1.90</b>                |                      |                                |                        |
|            | M                              |                          |                    |                         | 0.283                   |                               |                       |                             |                            |                       |                                |                             |                              |                                    |                            |                              |                                |                      |                         | <b>4.49</b>                |                      |                                |                        |
|            | H                              |                          |                    |                         |                         |                               |                       |                             |                            |                       |                                |                             |                              |                                    |                            |                              |                                |                      |                         | <b>4.09</b>                |                      |                                |                        |
| 7          | E                              |                          |                    |                         |                         |                               |                       |                             |                            |                       | 0.12                           | 0.04                        |                              |                                    |                            |                              |                                |                      |                         | <b>0.48</b>                |                      |                                |                        |
|            | M                              |                          |                    |                         |                         |                               |                       |                             |                            |                       |                                |                             |                              |                                    |                            |                              |                                |                      |                         |                            | <b>1.61</b>          |                                |                        |
|            | H                              | 0.26                     |                    |                         | 0.20                    |                               |                       |                             |                            |                       |                                |                             |                              |                                    |                            |                              |                                |                      |                         |                            | <b>1.65</b>          |                                |                        |
| 8          | E                              |                          |                    |                         |                         | 0.18                          |                       |                             |                            |                       |                                |                             |                              |                                    |                            | <b>0.50</b>                  |                                |                      |                         |                            |                      |                                |                        |
|            | M                              |                          | <b>4.19</b>        |                         |                         |                               |                       |                             |                            |                       |                                |                             |                              |                                    |                            | 2.05                         |                                |                      |                         |                            |                      |                                |                        |
| 9          | E                              | 0.20                     |                    |                         | 0.16                    |                               |                       |                             | 0.19                       |                       |                                |                             |                              |                                    |                            |                              |                                |                      | 0.14                    |                            |                      |                                |                        |
|            | M                              | <b>1.11</b>              | 0.14               |                         | 0.10                    |                               |                       |                             |                            |                       |                                |                             |                              |                                    |                            |                              |                                |                      |                         |                            |                      |                                |                        |
| 10         | E                              | 0.06                     |                    |                         |                         |                               | 0.05                  |                             |                            |                       |                                |                             |                              | 0.10                               |                            |                              |                                |                      |                         |                            | <b>0.33</b>          |                                |                        |
|            | M                              | 0.26                     |                    |                         |                         |                               | 0.10                  |                             |                            |                       |                                |                             |                              | 0.14                               |                            |                              |                                |                      |                         |                            | <b>0.64</b>          |                                |                        |

**Table S3.** Biomass of crustacean zooplankton species (mg L<sup>-1</sup>) in vertical profiles of studied humic lakes. E – epilimnion; M – metalimnion; H – hypolimnion.

| lake | layer | <i>Alonella nana</i> | <i>Bosmina longirostris</i> | <i>Euryceerus lamellatus</i> | <i>Chydorus sphaericus</i> | <i>Daphnia cucullata</i> | <i>Daphnia longispina</i> | <i>Diaphanosoma brachyurum</i> | <i>Holopedium gibberum</i> | <i>Ceriodaphnia quadrangula</i> | <i>Scapholeberis mucronata</i> | <i>Polyphemus pediculus</i> | <i>Mesocyclops leuckarti</i> | <i>Thermocyclops crassus</i> | <i>Diatyclops bicuspidatus</i> | <i>Eucyclops</i> sp. | <i>Cyclops</i> sp. | copepodite | Cyclopoida nauplii | <i>Eudiaptomus gracilis</i> | <i>Eudiaptomus graciloides</i> | copepodite | Calanoida nauplii |
|------|-------|----------------------|-----------------------------|------------------------------|----------------------------|--------------------------|---------------------------|--------------------------------|----------------------------|---------------------------------|--------------------------------|-----------------------------|------------------------------|------------------------------|--------------------------------|----------------------|--------------------|------------|--------------------|-----------------------------|--------------------------------|------------|-------------------|
| 1    | E     | 0.23                 |                             |                              |                            |                          | 1.87                      | 0.66                           |                            |                                 |                                | 0.01                        |                              |                              |                                |                      |                    |            |                    | 0.58                        | 0.54                           | 0.02       |                   |
|      | M     | 0.01                 |                             |                              |                            |                          |                           | 4.84                           |                            |                                 |                                |                             |                              |                              |                                |                      |                    |            |                    | 1.18                        | 0.38                           | 0.00       |                   |
|      | H     | 0.01                 |                             |                              |                            |                          | 0.01                      | 0.30                           |                            |                                 |                                |                             |                              |                              |                                |                      |                    |            |                    | 0.20                        | 0.05                           | 0.00       |                   |
| 2    | E     |                      |                             |                              |                            |                          | 1.19                      | 0.02                           | 0.02                       | 0.04                            |                                |                             | 0.01                         | 0.01                         |                                |                      |                    |            |                    | 0.69                        | 0.21                           | 0.00       |                   |
|      | M     |                      |                             |                              |                            |                          | 0.86                      | 0.74                           |                            |                                 |                                |                             |                              |                              | 0.01                           |                      |                    |            |                    | 0.12                        | 0.05                           |            |                   |
|      | H     |                      |                             |                              |                            |                          |                           | 0.12                           | 0.01                       |                                 |                                |                             |                              |                              |                                |                      |                    |            |                    | 0.05                        |                                |            |                   |
| 3    | E     | 0.26                 |                             |                              |                            |                          | 0.06                      | 0.99                           |                            |                                 |                                |                             |                              |                              |                                |                      |                    | 0.01       | 0.00               | 0.01                        | 0.03                           | 0.00       |                   |
|      | M     | 0.02                 | 0.18                        |                              |                            |                          | 0.02                      | 4.70                           |                            |                                 |                                |                             |                              |                              |                                |                      |                    | 0.00       |                    | 0.95                        | 0.37                           | 0.00       |                   |
|      | H     | 0.01                 |                             |                              |                            |                          |                           | 0.02                           |                            |                                 |                                |                             |                              |                              |                                |                      |                    |            |                    |                             |                                |            |                   |
| 4    | E     | 0.01                 | 0.14                        |                              |                            |                          | 0.02                      | 0.25                           | 4.94                       |                                 |                                | 0.03                        |                              |                              |                                |                      |                    | 0.02       |                    | 0.37                        | 0.55                           | 0.00       |                   |
|      | M     | 0.03                 |                             |                              |                            |                          |                           | 0.49                           | 3.92                       |                                 |                                |                             |                              |                              |                                |                      |                    |            |                    | 2.42                        | 1.35                           | 0.01       |                   |
|      | H     | 0.06                 |                             |                              |                            |                          | 0.24                      | 0.14                           | 0.57                       |                                 |                                | 0.05                        |                              |                              |                                |                      |                    | 0.06       | 0.00               | 0.05                        | 0.12                           | 0.01       |                   |
| 5    | E     |                      |                             |                              |                            |                          |                           | 5.58                           |                            |                                 |                                | 0.12                        |                              |                              |                                |                      |                    | 0.19       | 0.01               | 0.15                        | 0.17                           | 0.01       |                   |
|      | M     |                      |                             |                              | 0.15                       |                          |                           | 6.39                           |                            |                                 |                                | 0.15                        |                              |                              |                                |                      |                    | 0.06       | 0.00               | 0.22                        | 0.27                           | 0.01       |                   |
|      | H     |                      |                             |                              |                            |                          |                           | 1.91                           |                            |                                 |                                | 0.05                        |                              |                              |                                |                      |                    | 0.05       | 0.00               |                             |                                |            |                   |
| 6    | E     | 0.04                 | 0.00                        |                              |                            |                          |                           |                                | 0.02                       |                                 |                                |                             |                              |                              |                                |                      |                    | 0.01       | 0.00               | 0.34                        | 0.30                           | 0.00       |                   |
|      | M     |                      | 0.00                        |                              |                            |                          |                           |                                |                            | 0.01                            |                                |                             |                              |                              |                                |                      |                    | 0.00       |                    | 0.05                        | 0.01                           | 0.00       |                   |
|      | H     | 0.12                 | 0.04                        |                              |                            |                          |                           |                                |                            |                                 |                                |                             |                              |                              |                                |                      |                    |            |                    | 0.02                        | 0.00                           |            |                   |
| 7    | E     | 1.52                 |                             |                              |                            |                          | 0.02                      | 0.26                           |                            |                                 |                                | 0.01                        |                              |                              |                                |                      |                    | 0.03       | 0.01               | 0.10                        | 0.02                           | 0.00       |                   |
|      | M     | 0.77                 |                             |                              |                            |                          |                           | 0.69                           |                            |                                 |                                | 0.01                        |                              |                              |                                |                      |                    |            | 0.00               | 0.67                        | 0.03                           | 0.01       |                   |
|      | H     | 0.00                 |                             |                              |                            |                          |                           | 0.36                           |                            |                                 |                                |                             |                              |                              |                                |                      |                    |            |                    | 0.07                        | 0.04                           | 0.00       |                   |
| 8    | E     |                      |                             |                              |                            |                          |                           | 0.04                           |                            |                                 |                                |                             |                              |                              |                                |                      |                    |            |                    | 0.98                        | 0.55                           | 0.47       |                   |
|      | M     |                      |                             |                              |                            |                          |                           | 0.02                           |                            |                                 |                                |                             |                              |                              |                                |                      |                    |            |                    | 0.58                        | 0.26                           | 0.50       |                   |
| 9    | E     |                      |                             |                              |                            |                          | 0.05                      | 1.96                           | 3.90                       |                                 |                                |                             |                              |                              |                                |                      |                    |            |                    | 0.03                        | 0.03                           | 0.02       |                   |
|      | M     |                      |                             |                              |                            |                          |                           | 0.17                           | 0.38                       |                                 |                                |                             |                              |                              |                                |                      |                    |            |                    |                             |                                | 0.00       |                   |
| 10   | E     | 0.14                 |                             |                              |                            | 0.06                     |                           | 0.64                           |                            |                                 |                                | 0.12                        |                              |                              |                                |                      |                    | 0.09       | 0.00               | 0.02                        | 0.01                           | 0.01       |                   |
|      | M     | 0.04                 |                             |                              | 0.12                       | 0.06                     |                           | 2.31                           |                            |                                 |                                | 0.45                        |                              |                              |                                |                      |                    | 0.13       | 0.01               | 0.11                        | 0.01                           | 0.00       |                   |

**Table S4.** Biomass of Rotifera species (mg L<sup>-1</sup>) in vertical profiles of studied humic lakes. E – epilimnion; M – metalimnion; H – hypolimnion.

| lake | layer | <i>Ascomorpha ecaudis</i> | <i>Ascomorpha ovalis</i> | <i>Asplanchna priodonta</i> | <i>Cephalodella tenuisetata</i> | <i>Collotheca mutabilis</i> | <i>Collotheca pelagica</i> | <i>Colurella obtusa</i> | <i>Conochiloides coenobasis</i> | <i>Conochiloides dossuarius</i> | <i>Filinia longisetata</i> | <i>Gastropus stylifer</i> | <i>Keratella cochlearis</i> | <i>Keratella quadrata</i> | <i>Lecane acuta</i> | <i>Lecane bulla</i> | <i>Lecane clostercerca</i> | <i>Lecane elasma</i> | <i>Lecane flexilis</i> | <i>Lecane galeata</i> | <i>Lecane stichaea</i> | <i>Lecane tenuisetata</i> | <i>Polyarthra minor</i> | <i>Polyarthra remata</i> | <i>Polyarthra vulgaris</i> | <i>Synchaeta longipes</i> | <i>Synchaeta pectinata</i> | <i>Trichocerca cylindrica</i> | <i>Trichocerca similis</i> | <i>Trichocerca simoneae</i> |
|------|-------|---------------------------|--------------------------|-----------------------------|---------------------------------|-----------------------------|----------------------------|-------------------------|---------------------------------|---------------------------------|----------------------------|---------------------------|-----------------------------|---------------------------|---------------------|---------------------|----------------------------|----------------------|------------------------|-----------------------|------------------------|---------------------------|-------------------------|--------------------------|----------------------------|---------------------------|----------------------------|-------------------------------|----------------------------|-----------------------------|
| 1    | E     |                           | 0.13                     | 2.56                        |                                 |                             | 0.24                       |                         | 0.33                            |                                 |                            |                           |                             |                           |                     |                     |                            |                      |                        |                       |                        |                           |                         |                          | 0.22                       |                           | 0.16                       |                               | 0.14                       | 0.11                        |
|      | M     | 0.10                      |                          | 25.52                       |                                 |                             |                            |                         |                                 |                                 |                            |                           |                             |                           |                     |                     |                            |                      |                        |                       |                        |                           |                         | 0.65                     |                            | 0.14                      |                            | 0.18                          |                            |                             |
|      | H     | 0.10                      |                          | 0.76                        |                                 |                             |                            |                         |                                 |                                 |                            | 0.76                      | 0.13                        |                           |                     |                     |                            |                      |                        |                       |                        |                           |                         |                          |                            |                           | 0.78                       |                               |                            |                             |
| 2    | E     |                           |                          | 0.95                        |                                 |                             |                            |                         |                                 |                                 |                            |                           |                             |                           |                     |                     |                            |                      |                        |                       |                        |                           |                         | 0.44                     |                            |                           |                            |                               |                            |                             |
|      | M     |                           |                          | 8.72                        |                                 |                             |                            |                         |                                 |                                 |                            |                           |                             |                           |                     |                     |                            |                      |                        |                       |                        |                           |                         | 0.24                     |                            |                           |                            |                               |                            |                             |
|      | H     |                           |                          | 1.16                        |                                 |                             |                            |                         |                                 |                                 |                            |                           |                             |                           |                     |                     |                            |                      |                        |                       |                        | 0.90                      |                         | 0.22                     |                            |                           |                            |                               |                            |                             |
| 3    | E     |                           |                          |                             |                                 |                             |                            | 0.26                    |                                 |                                 |                            |                           |                             |                           |                     |                     |                            |                      |                        |                       |                        |                           | 0.13                    |                          |                            |                           |                            | 0.90                          |                            |                             |
|      | M     |                           |                          |                             |                                 |                             |                            |                         |                                 |                                 |                            |                           |                             |                           |                     |                     |                            |                      |                        |                       |                        |                           |                         | 0.19                     |                            |                           |                            |                               | 0.19                       |                             |
|      | H     |                           |                          |                             |                                 |                             |                            |                         |                                 |                                 |                            |                           |                             |                           |                     |                     |                            |                      |                        |                       |                        |                           |                         | 0.21                     |                            |                           |                            |                               |                            |                             |
| 4    | E     |                           |                          | 0.17                        |                                 | 0.15                        | 0.21                       |                         | 0.11                            |                                 | 0.39                       | 0.25                      |                             | 0.16                      |                     |                     |                            |                      |                        |                       |                        |                           |                         |                          | 0.12                       |                           |                            |                               | 0.11                       |                             |
|      | M     |                           |                          |                             |                                 |                             |                            |                         | 0.76                            |                                 | 0.20                       | 0.39                      |                             |                           |                     |                     |                            |                      |                        |                       |                        |                           |                         |                          | 0.24                       |                           |                            |                               | 0.11                       |                             |
|      | H     |                           |                          |                             |                                 |                             |                            |                         | 0.11                            |                                 |                            | 0.52                      |                             |                           | 0.39                |                     | 0.80                       |                      |                        |                       |                        |                           |                         |                          |                            |                           |                            |                               | 0.44                       |                             |
| 5    | E     |                           |                          | 0.98                        |                                 |                             |                            |                         |                                 | 0.30                            | 0.42                       | 0.39                      |                             |                           |                     |                     |                            |                      |                        |                       |                        |                           |                         | 0.82                     |                            |                           |                            |                               | 0.44                       |                             |
|      | M     |                           |                          | 0.25                        |                                 |                             |                            |                         | 0.66                            |                                 | 0.84                       |                           |                             |                           |                     |                     | 0.10                       |                      |                        |                       |                        |                           |                         | 0.37                     |                            |                           |                            | 0.10                          |                            |                             |
|      | H     |                           |                          | 0.98                        |                                 |                             |                            |                         | 0.20                            | 0.40                            | 0.84                       | 0.78                      |                             |                           |                     | 0.10                |                            |                      |                        |                       |                        |                           |                         | 0.19                     |                            |                           |                            |                               |                            |                             |
| 6    | E     |                           |                          | 0.15                        |                                 |                             |                            |                         |                                 |                                 |                            |                           |                             | 0.96                      |                     |                     |                            | 0.20                 | 0.90                   |                       |                        |                           |                         |                          |                            |                           |                            | 0.10                          | 0.33                       |                             |
|      | M     |                           |                          |                             |                                 |                             |                            |                         |                                 |                                 |                            |                           |                             | 0.48                      |                     |                     |                            |                      | 0.90                   |                       |                        |                           |                         | 0.34                     |                            |                           |                            |                               | 0.15                       |                             |
|      | H     |                           |                          |                             |                                 |                             |                            |                         |                                 |                                 |                            |                           |                             | 0.32                      |                     |                     |                            |                      |                        |                       |                        |                           |                         |                          |                            |                           |                            |                               |                            |                             |
| 7    | E     |                           |                          |                             |                                 | 0.30                        |                            |                         | 0.98                            |                                 |                            | 0.13                      |                             |                           |                     |                     |                            |                      |                        |                       |                        |                           |                         |                          |                            |                           | 0.67                       | 0.75                          |                            |                             |
|      | M     |                           |                          |                             |                                 | 0.22                        | 0.36                       |                         |                                 |                                 |                            | 0.27                      |                             |                           |                     |                     |                            |                      |                        |                       |                        |                           |                         |                          |                            |                           | 0.55                       | 0.18                          |                            |                             |
|      | H     |                           |                          |                             |                                 |                             |                            |                         |                                 |                                 |                            | 0.16                      |                             |                           |                     |                     |                            |                      |                        |                       |                        |                           |                         |                          |                            |                           | 0.14                       |                               |                            |                             |
| 8    | E     |                           |                          | 0.20                        |                                 |                             |                            |                         | 0.23                            |                                 |                            |                           |                             |                           |                     |                     |                            |                      |                        |                       |                        |                           |                         |                          |                            |                           |                            |                               |                            |                             |
|      | M     |                           |                          | 0.20                        |                                 |                             |                            |                         | 0.20                            |                                 |                            |                           | 0.65                        |                           |                     |                     |                            |                      |                        |                       |                        |                           |                         |                          |                            |                           |                            |                               | 0.11                       |                             |
| 9    | E     | 0.10                      |                          | 0.20                        |                                 |                             |                            |                         | 0.16                            |                                 |                            |                           |                             |                           |                     |                     |                            |                      |                        |                       | 0.21                   |                           | 0.40                    | 0.54                     | 0.11                       | 0.86                      |                            |                               | 0.17                       |                             |
|      | M     |                           |                          | 0.98                        |                                 |                             |                            |                         |                                 |                                 |                            |                           |                             |                           |                     |                     |                            |                      |                        |                       |                        |                           | 0.21                    | 0.61                     |                            |                           |                            |                               | 0.11                       |                             |
| 10   | E     |                           |                          | 0.75                        |                                 |                             |                            |                         |                                 |                                 | 0.39                       | 0.43                      |                             |                           |                     |                     |                            |                      |                        |                       |                        |                           | 0.78                    |                          |                            |                           |                            |                               | 0.33                       |                             |
|      | M     |                           |                          | 1.65                        |                                 |                             |                            |                         | 0.13                            |                                 | 0.20                       | 0.33                      |                             |                           |                     |                     |                            |                      |                        |                       |                        |                           | 0.19                    | 0.68                     |                            |                           |                            |                               | 0.88                       |                             |
